# Supplementary material
Source: publisher figshare collection journal article supplement (https://karger.figshare.com/ndownloader/files/18077405)
Supplement: Supplementary file 1 [file 18077405]

**Supplementary Table S1.** Histologic distribution and survival outcomes (*n* = 256)

| Histologic subtype | No. of patients (%) | % 5-year RFS | % 5-year OS |
| --- | --- | --- | --- |
| Mucoepidermoid carcinoma | 81 (31.6) | 93.3 | 96.0 |
| Carcinoma ex pleomorphic adenoma | 43 (16.8) | 81.3 | 91.5 |
| Acinic cell carcinoma | 39 (15.2) | 91.4 | 100 |
| Adenoid cystic carcinoma | 30 (11.7) | 64.5 | 87.5 |
| Adenocarcinoma | 24 (9.4) | 100 | 91.3 |
| Salivary ductal carcinoma | 13 (5.1) | 60.6 | 76.2 |

*RFS* recurrence-free survival, *OS* overall survival
